# Supplementary material for: PI3K and AKT: Unfaithful Partners in Cancer
Source: MDPI journal article supplement (doi:10.3390/ijms160921138), 2015-09-03
Supplement: s1 [file s1]

## Supplementary Information

**Table S1.** PI3K and AKT inhibitors and their clinical development. Inhibitors of the PI3 kinase and AKT are listed with emphasis on their molecular target, mechanism of action and clinical trial stage (as according to ClinicalTrial.gov August 2015). CAL-101 (idelalisib, GS1101) was FDA approved in 2014 for the treatment of CLL (chronic lymphocytic leukemia), SLL (small lymphocytic lymphoma) and follicular lymphoma. FDA granted orphan drug designation to IPI145 (INK1197, duvelisib) for the potential treatment of CLL and SLL. No further PI3K or AKT inhibitor has reached US FDA approval by August 2015.

| Agent                                                                         | Molecular Target                                | Mechanism of Action                                                                                                                                                        | Clinical Trial Stage                |
|-------------------------------------------------------------------------------|-------------------------------------------------|----------------------------------------------------------------------------------------------------------------------------------------------------------------------------|-------------------------------------|
| <b><i>Pan-PI3K Inhibitors</i></b>                                             |                                                 |                                                                                                                                                                            |                                     |
| BAY80-6946 (copanlisib)                                                       | Class I PI3Ks (preferentially p110 alpha/delta) | inhibits catalytic activity of Class I PI3Ks, preferentially p110 alpha and delta                                                                                          | Phase III                           |
| BKM120 (buparlisib)                                                           | Class I PI3Ks                                   | ATP-competitive mechanism by binding to ATP-binding site of the lipid kinase of Class I PI3K isoforms, G2-M arrest upon binding to tubulin and microtubule destabilization | Phase III                           |
| GDC0941 (pictilisib)                                                          | Class I PI3Ks                                   | ATP-competitive inhibitor                                                                                                                                                  | Phase II                            |
| PX-866                                                                        | Class I PI3Ks                                   | irreversible inhibition of PI3K by interaction with the ATP catalytic site                                                                                                 | Phase II                            |
| XL147 (pilaralisib, SAR245408)                                                | Class I PI3Ks                                   | ATP-competitive inhibitor                                                                                                                                                  | Phase II                            |
| CH5132799                                                                     | Class I PI3Ks (preferentially p110 alpha)       | ATP-competitive inhibitor                                                                                                                                                  | Phase I                             |
| CUDC-907                                                                      | PI3K and HDAC (histone deacetylases)            | inhibition of PI3K and HDAC activity                                                                                                                                       | Phase I                             |
| ZSTK474                                                                       | Class I PI3Ks (preferentially p110 delta)       | ATP-competitive inhibitor                                                                                                                                                  | Phase I                             |
| WX037                                                                         | Class I PI3Ks                                   | no further information                                                                                                                                                     | Phase I **                          |
| AMG511, BAG956, NVP-QAV-572, PI 828, PIK-90, PF-4989216, TG100713, wortmannin |                                                 |                                                                                                                                                                            | no clinical cancer trial registered |

Table S1. *Cont.*

| Agent                                      | Molecular Target | Mechanism of Action                                     | Clinical Trial Stage                |
|--------------------------------------------|------------------|---------------------------------------------------------|-------------------------------------|
| <b>Dual pan-PI3K/mTOR Inhibitors</b>       |                  |                                                         |                                     |
| BEZ235 (dactolisib)                        | PI3Ks and mTOR   | ATP-competitive inhibitor                               | Phase II                            |
| BGT226                                     | PI3Ks and mTOR   | ATP-competitive inhibitor                               | Phase II                            |
| GDC0980 (apitolisib, RG7422)               | PI3Ks and mTOR   | ATP-competitive inhibitor                               | Phase II                            |
| LY3023414                                  | PI3Ks and mTOR   | ATP-competitive inhibitor                               | Phase II                            |
| PF-05212384 (gedatolisib, PKI587)          | PI3Ks and mTOR   | ATP-competitive inhibitor                               | Phase II                            |
| XL765 (SAR245409, voxtalisib)              | PI3Ks and mTOR   | ATP-competitive inhibitor                               | Phase II                            |
| PF04691502                                 | PI3Ks and mTOR   | ATP-competitive inhibitor                               | Phase II ***                        |
| DS7423                                     | PI3Ks and mTOR   | inhibits PI3K and mTOR, induces p53-dependent apoptosis | Phase I                             |
| GDC0084                                    | PI3Ks and mTOR   | ATP-competitive inhibitor                               | Phase I                             |
| GSK2126458 (omipalisib, GSK458)            | PI3Ks and mTOR   | ATP-competitive inhibitor                               | Phase I                             |
| PWT33597                                   | PI3Ks and mTOR   | ATP-competitive inhibitor                               | Phase I                             |
| SF1126<br>(LY294002/SF1101)                | PI3Ks and mTOR   | ATP-competitive inhibitor                               | Phase I                             |
| VS-5584 (SB2343)                           | PI3Ks and mTOR   | ATP-competitive inhibitor                               | Phase I                             |
| GSK1059615                                 | PI3Ks and mTOR   | ATP-competitive inhibitor                               | Phase I **                          |
| GNE-317, GNE-477, PI-103, PI-3065, PKI-402 |                  |                                                         | no clinical cancer trial registered |

Table S1. Cont.

| Agent                                                                                                                                                                                                                                 | Molecular Target       | Mechanism of Action              | Clinical Trial Stage                                |
|---------------------------------------------------------------------------------------------------------------------------------------------------------------------------------------------------------------------------------------|------------------------|----------------------------------|-----------------------------------------------------|
| <b><i>Isoform-Selective PI3K Inhibitors</i></b>                                                                                                                                                                                       |                        |                                  |                                                     |
| CAL-101 (idelalisib, GS1101)                                                                                                                                                                                                          | p110 delta             | ATP-competitive inhibitor        | FDA approved 2014<br>Phase III                      |
| IPI145 (INK1197, duvelisib)                                                                                                                                                                                                           | p110 delta/gamma       | ATP-competitive inhibitor        | FDA granted<br>orphan drug designation<br>Phase III |
| GDC0032                                                                                                                                                                                                                               | p110 alpha/delta/gamma | ATP-competitive inhibitor        | Phase III                                           |
| BYL719 (alpelisib)                                                                                                                                                                                                                    | p110 alpha             | ATP-competitive inhibitor        | Phase II                                            |
| INCB040093                                                                                                                                                                                                                            | p110 delta             | no further information           | Phase II                                            |
| AMG 319                                                                                                                                                                                                                               | p110 delta             | no further information           | Phase I                                             |
| AZD8186                                                                                                                                                                                                                               | p110 beta/delta        | interaction with kinase activity | Phase I                                             |
| AZD8835                                                                                                                                                                                                                               | p110 alpha/delta       | interaction with kinase activity | Phase I                                             |
| GS-9820 (acalisib)                                                                                                                                                                                                                    | p110 delta             | interaction with kinase activity | Phase I                                             |
| GSK2636771                                                                                                                                                                                                                            | p110 beta              | interaction with kinase activity | Phase I                                             |
| MLN1117 (INK1117)                                                                                                                                                                                                                     | p110 alpha             | ATP-competitive inhibitor        | Phase I                                             |
| PWT-143                                                                                                                                                                                                                               | p110 delta             | no further information           | Phase I                                             |
| RP6530                                                                                                                                                                                                                                | p110 delta/gamma       | no further information           | Phase I                                             |
| SAR260301                                                                                                                                                                                                                             | p110 beta              | interaction with kinase activity | Phase I                                             |
| A66, AS-252424, AS-604850, AS-605240, CAL-130, CAL-263, CAY10505, CZC24832, GNE-293, HS-173, IC-87114, IPI443, KAR4139, KIN193 (AZD6482), PI3Kgamma inhibitor 1, PIK-75, PIK-293, PIK-294, PK-93, RV1729, TG100-115, TGX-221, TRG1202 |                        |                                  | no clinical cancer trial registered                 |

Table S1. *Cont.*

| Agent                                                                                                                                                                                                     | Molecular Target                                          | Mechanism of Action                                                                                        | Clinical Trial Stage                |
|-----------------------------------------------------------------------------------------------------------------------------------------------------------------------------------------------------------|-----------------------------------------------------------|------------------------------------------------------------------------------------------------------------|-------------------------------------|
| <b>AKT Inhibitors</b>                                                                                                                                                                                     |                                                           |                                                                                                            |                                     |
| LY317615 (enzasturin)                                                                                                                                                                                     | PKCbeta, AKT, GSK3beta and ribosomal protein S6           | inhibits phosphorylation of PKCbeta, AKT, GSK3beta and ribosomal protein S6 by binding to ATP-binding site | Phase III                           |
| perifosine (KRX-0401)                                                                                                                                                                                     | AKT interaction with phospholipids                        | Inhibition of PH domain mediated membrane recruitment of AKT results in reduced AKT phosphorylation        | Phase III *                         |
| AZD5363                                                                                                                                                                                                   | AKT1, 2, 3                                                | ATP-competitive inhibitor                                                                                  | Phase II                            |
| GDC0068 (ipatasertib)                                                                                                                                                                                     | AKT1, 2, 3                                                | ATP-competitive inhibitor                                                                                  | Phase II                            |
| GSK2110183 (afuresertib)                                                                                                                                                                                  | AKT1, 2, 4                                                | ATP-competitive inhibitor                                                                                  | Phase II                            |
| GSK2141795<br>(GSK795, uprosertib)                                                                                                                                                                        | AKT1, 2, 3                                                | ATP-competitive inhibitor                                                                                  | Phase II                            |
| LY2780301                                                                                                                                                                                                 | p70S6 kinase and AKT                                      | ATP-competitive inhibitor of p70S6 kinase and AKT                                                          | Phase II                            |
| MK-2206                                                                                                                                                                                                   | AKT1, 2, 3                                                | allosteric inhibitor                                                                                       | Phase II                            |
| ONC201 (TIC10)                                                                                                                                                                                            | AKT, ERK (extracellular signal regulated kinases)         | inactivation of AKT and ERK                                                                                | Phase II                            |
| PBI-05204 (oleandrin)                                                                                                                                                                                     | AKT, FGF-2 (fibroblast growth factor 2), NF-κB and p70S6K | inhibition of Na-K ATPase pump activity                                                                    | Phase II                            |
| RX-0201                                                                                                                                                                                                   | AKT1                                                      | AKT1 antisense oligonucleotide that binds to mRNA and inhibits translation                                 | Phase II                            |
| tricitiribine (PTX-200)                                                                                                                                                                                   | AKT1, 2, 3                                                | inhibits AKT phosphorylation and AKT kinase activity, DNA synthesis inhibitor                              | Phase II                            |
| AT13148                                                                                                                                                                                                   | AGC kinases including AKT, p70S6, PKA, SGK and Rho        | multiple AGC kinase inhibitor                                                                              | Phase I                             |
| GSK690693                                                                                                                                                                                                 | AKT1, 2, 3                                                | ATP-competitive inhibitor                                                                                  | Phase I **                          |
| 10-DEBC, 3,5-dimethyl PIT-1, 3CAI (AKT Inhibitor XIX), A-443654, A-674563, AKTi-1/2, AKT inhibitor VIII, AT7867, CCT128930, deguelin, erucylphosphocholine, FPA 124, KP372-1, palomid 529, PHT-427, SC 66 |                                                           |                                                                                                            | no clinical cancer trial registered |

\* one phase III trial (colorectal cancer) completed, one phase III trial (multiple myeloma) discontinued after interim results, several phase II trials active or completed; \*\* study terminated; \*\*\* three phase II trials terminated due to tolerability findings, clinical development discontinued in 2012.

**Table S2.** Genetic alterations in the PI3Ks/AKT signaling pathway in human cancers. Genetic alterations of the PI3K, PTEN and AKT resulting in an overactivation of the PI3K/AKT signaling pathway and manifestation of human cancers are listed. Cancer types with a frequency of >5% of the corresponding genetic alteration are displayed.

| Genetic Alteration             | Cancer Type                                                                                                                                                |
|--------------------------------|------------------------------------------------------------------------------------------------------------------------------------------------------------|
| <i>Class IA PI3K—PIK3CA</i>    |                                                                                                                                                            |
| Activating mutation            | Endometrial, Breast, Ovarian, Colorectal, Bladder, Lung, Cervical, Glioblastoma, Head and neck, Oesophageal, Melanoma, Hepatocellular, Gastric, Pancreatic |
| Copy number gain/Amplification | Head and neck, Cervical, Lung, Lymphoma, Ovarian, Gastric, Thyroid, Prostate, Breast, Glioblastoma, Endometrial, Oesophageal, Leukemia                     |
| Increased expression           | Prostate                                                                                                                                                   |
| <i>Class IA PI3K—PIK3CB</i>    |                                                                                                                                                            |
| Copy number gain/Amplification | Lung, Thyroid, Ovarian, Lymphoma, Glioblastoma, Breast                                                                                                     |
| Increased expression           | Prostate, Bladder, Colorectal                                                                                                                              |
| <i>Class IA PI3K—PIK3CD</i>    |                                                                                                                                                            |
| Copy number gain               | Glioblastoma                                                                                                                                               |
| Increased expression           | Neuroblastoma, Glioblastoma                                                                                                                                |
| <i>Class IA PI3K—PIK3R1</i>    |                                                                                                                                                            |
| Inactivating mutation          | Endometrial, Pancreatic, Glioblastoma, Colorectal                                                                                                          |
| Copy number loss               | Ovarian                                                                                                                                                    |
| Decreased expression           | Prostate, Breast, Lung, Ovarian, Bladder                                                                                                                   |
| <i>Class IA PI3K—PIK3R2</i>    |                                                                                                                                                            |
| Amplification                  | Lymphoma                                                                                                                                                   |
| Increased expression           | Colorectal, Breast                                                                                                                                         |
| <i>Class IA PI3K—PIK3R3</i>    |                                                                                                                                                            |
| Copy number gain               | Ovarian                                                                                                                                                    |
| <i>Class IB PI3K—PIK3CG</i>    |                                                                                                                                                            |
| Copy number gain               | Ovarian                                                                                                                                                    |
| Increased expression           | Breast, Prostate, Medulloblastoma                                                                                                                          |

Table S2. Cont.

|                             |                                                                                                                                                     |
|-----------------------------|-----------------------------------------------------------------------------------------------------------------------------------------------------|
| <i>Class IB PI3K—PIK3R5</i> |                                                                                                                                                     |
| Activating mutation         | Melanoma                                                                                                                                            |
| <i>PTEN</i>                 |                                                                                                                                                     |
| Loss of heterozygosity      | Glioblastoma, Gastric, Melanoma, Prostate, Breast, Endometrial, Leukemia                                                                            |
| Inactivating mutation       | Glioblastoma, Melanoma, Prostate, Endometrial, Colorectal, Ovarian, Breast, Leukemia, Gastric, Hepatocellular, Renal, Vulva, Bladder, Lung, Thyroid |
| Decreased expression        | Breast, Melanoma, Prostate                                                                                                                          |
| <i>AKT1</i>                 |                                                                                                                                                     |
| Amplification               | Gastric                                                                                                                                             |
| <i>AKT2</i>                 |                                                                                                                                                     |
| Amplification               | Head and neck, Pancreatic, Ovarian                                                                                                                  |
